# Supplementary material
Source: Springer Nature journal article supplement (https://www.springermedizin.de/resource/supplementary/12936_2007_416_MOESM7_ESM.pdf/9547400)

**104S (Re/Re)**

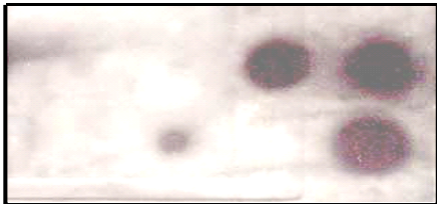

**104L (S/S)**

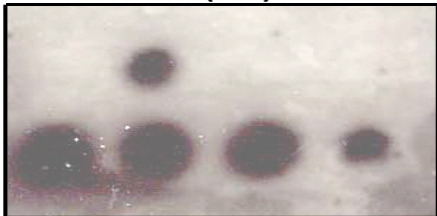

**104F (Rw/Rw)**

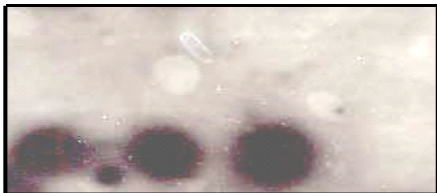

Supplement: MOESM7 [file 9547400]
